# Supplementary material for: [(Salen*)Co(OAc)] as a robust initiator for the immortal bulk ring-opening (co)polymerization of l -lactide and ε-caprolactone
Source: Royal Society of Chemistry journal article supplement (doi:10.1039/d5cy01106j), 2025-11-15
Supplement: d5cy01106j1.pdf [file d5cy01106j1.pdf]

## Supporting information for

# [(Salen\*)Co(OAc)] as robust initiator for the immortal bulk ring-opening (co)polymerization of L-lactide and $\epsilon$ -caprolactone

*Maxime Michelas,<sup>a</sup> Gabrielle Duffaut,<sup>a</sup> Rinaldo Poli<sup>a,b</sup> and Christophe Fliedel<sup>a,\*</sup>*

<sup>a</sup> CNRS, Laboratoire de Chimie de Coordination (LCC), Université de Toulouse (UPS), INPT, 205 Route de Narbonne, 31077 Toulouse, Cedex 4, France.

<sup>b</sup> Institut Universitaire de France, 1 rue Descartes, 75231 Paris Cedex 05, France.

Corresponding author: [christophe.fliedel@lcc-toulouse.fr](mailto:christophe.fliedel@lcc-toulouse.fr)

### Content

Table S1. Results of the bulk ROP of  $\epsilon$ -caprolactone (CL) at 120 °C initiated by complex **1**.

Figure S1. Plot of the conversion as a function of time for the bulk ROP of CL at 120 °C initiated by complex **1**.

Figure S2. Dependence of the PCL molar masses and dispersity indexes ( $\bar{D}$ ) on the CL conversion for the bulk ROP of CL at 120 °C initiated by complex **1**.

Figure S3. Analyses of the PCL prepared by ROP of CL mediated by **1**.  
(a) MALDI-ToF MS (b) GPC trace.

Figure S4. Expanded region of the MALDI-ToF MS in Figure S3 highlighting the isotopic envelopes with main peaks at 1296.1 and 1317.7 a.u. and simulated isotopic distributions.

Figure S5. Pseudo-first-order kinetic data for the bulk ROP of CL at 120 °C initiated by complex **1** in the absence or presence of MeOH for three independent experiments showing standard deviation.

Figure S6. ESI-MS of the PCL prepared by immortal ROP of CL mediated by **1**.

Figure S7. Expanded region of the ESI-MS in Figure S5 highlighting the isotopic envelopes with peaks at 1190.7 and 1195.7 a.u. and simulated isotopic distributions.

Figure S8. Expanded regions of the MALDI-ToF MS in Figure S3a and ESI-MS in Figure S5 highlighting the presence of the isotopic envelope corresponding to PCL initiated by the OAc group (blue boxes) in both spectra.

Table S2. Results of the bulk ROP of *L*-lactide (LLA) at 120 °C initiated by complex **1**.

Figure S9. MALDI-ToF MS of the PLLA prepared by ROP of LLA mediated by **1**.

Figure S10. Expanded region of the ESI-MS in Figure S7 highlighting different isotopic envelopes in the region 1265.8-1359.4 a.u. and simulated isotopic distributions.

Figure S11. Pseudo-first-order kinetic data for the bulk ROP of LLA at 120 °C initiated by complex **1** in the absence or presence of MeOH for three independent experiments showing standard deviation.

Figure S12. MALDI-ToF MS of the PLLA prepared by immortal ROP of LLA mediated by **1**.

Figure S13a. Most abundant homopolymer identified using the Polymerix software, from the MALDI-ToF MS in Figure S9.

Figure S13b. Expanded region of the MALDI-ToF MS in Figure S9 highlighting the isotopic envelopes with main peaks at 3300.9 and 3372.9 a.u. and simulated isotopic distributions.

Figure S14a. Lowest abundant homopolymer identified using the Polymerix software, from the MALDI-ToF MS in Figure S9.

Figure S14b. Expanded region of the MALDI-ToF MS in Figure S9 (zoom x16) highlighting the isotopic envelopes with main peaks at 3282.9 and 3354.9 a.u. and simulated isotopic distributions.

Figure S15. Expanded regions of the MALDI-ToF MS in Figure S8 and Figure S10 highlighting the presence of the isotopic envelope corresponding to PLLA initiated by the OAc group (blue boxes) in both spectra.

Figure S16. <sup>1</sup>H NMR spectrum (expansion of the 3.5-8 ppm region, CDCl<sub>3</sub>) of the PLLA prepared by immortal ROP of LLA mediated by **1**, showing the signals of the PLLA-OCH<sub>2</sub>Ph group.

Figure S17. <sup>1</sup>H NMR spectrum (expansion of the 0.5-6 ppm region, CDCl<sub>3</sub>) of the reaction medium of the sequential bulk coROP of CL and LLA catalysed by complex **1** under immortal conditions.

Figure S18. <sup>1</sup>H NMR spectrum (expansion of the 0.5-6 ppm region, CDCl<sub>3</sub>) of the isolated PCL-*b*-PLLA block copolymer synthesized by sequential bulk copolymerization of CL and LLA catalysed by complex **1** under immortal conditions.

Table S1. Results of the bulk ring-opening polymerization (ROP) of  $\epsilon$ -caprolactone (CL) at 120 °C initiated by complex **1**.

| Entry | [CL] <sub>0</sub> /[ <b>1</b> ] | [MeOH]/[ <b>1</b> ] | Time<br>(h) | Conv. <sup>a</sup><br>(%) | $M_{n,theo}$ <sup>b</sup><br>(g/mol) | $M_{n,corr}$ <sup>c</sup><br>(g/mol) | $\bar{D}$ <sup>d</sup> |
|-------|---------------------------------|---------------------|-------------|---------------------------|--------------------------------------|--------------------------------------|------------------------|
| 1     | 500                             | 0                   | 24          | 2.5                       | 1400                                 | 1600                                 | 1.04                   |
| 2     | 500                             | 0                   | 48          | 3                         | 1700                                 | 1700                                 | 1.04                   |
| 3     | 500                             | 0                   | 96          | 4                         | 2300                                 | 2500                                 | 1.03                   |
| 4     | 500                             | 0                   | 120         | 9                         | 5100                                 | 4600                                 | 1.04                   |
| 5     | 500                             | 0                   | 168         | 60                        | 34200                                | 9300                                 | 1.20                   |
| 6     | 500                             | 2                   | 21.5        | 6                         | 1150                                 | 1700                                 | 1.02                   |
| 7     | 500                             | 2                   | 48          | 11                        | 2100                                 | 2200                                 | 1.10                   |
| 8     | 500                             | 2                   | 72          | 17                        | 3200                                 | 3100                                 | 1.07                   |
| 9     | 500                             | 2                   | 96          | 27                        | 5300                                 | 5200                                 | 1.09                   |
| 10    | 500                             | 5                   | 21.5        | 8                         | 800                                  | 800                                  | 1.20                   |
| 11    | 500                             | 5                   | 48          | 17                        | 1600                                 | 1900                                 | 1.10                   |
| 12    | 500                             | 5                   | 72          | 23                        | 2200                                 | 2300                                 | 1.08                   |
| 13    | 500                             | 5                   | 96          | 43                        | 4200                                 | 4500                                 | 1.09                   |

<sup>a</sup> Determined by gravimetry and/or from <sup>1</sup>H NMR analysis. <sup>b</sup> Calculated according to  $M_{n,theo} = ([CL]_0/[1]) \times (1/([1]+[MeOH])) \times M_{CL} \times \text{conversion}$ , where  $M_{CL} = 114.14$  g/mol. The molecular weights of both the  $\alpha$ - (initiating group(s)) and  $\omega$ -chain (H) end were not taking into account due to their negligible masses.

<sup>c</sup> Determined by gel permeation chromatography (GPC), using polystyrene (PS) standards and applying the correction factor of 0.56. <sup>d</sup> Determined by GPC.

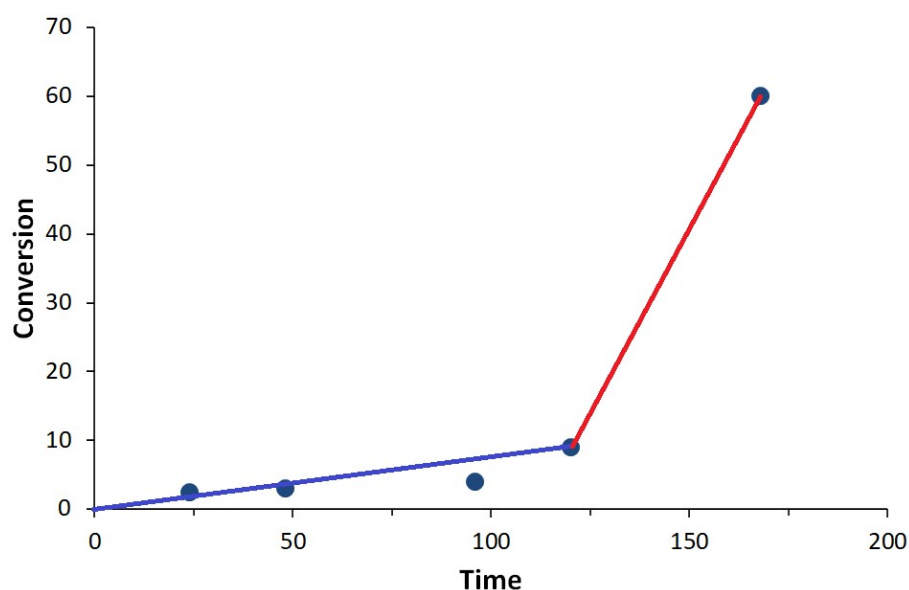

Figure S1. Plot of the conversion as a function of time for the bulk ring-opening polymerization (ROP) of  $\epsilon$ -caprolactone (CL) at 120 °C initiated by complex **1** (initial ratio:  $[\text{CL}]/[\mathbf{1}] = 500$ ). Two ROP regimes can be observed, an initially slow ROP until 120 h (blue line).

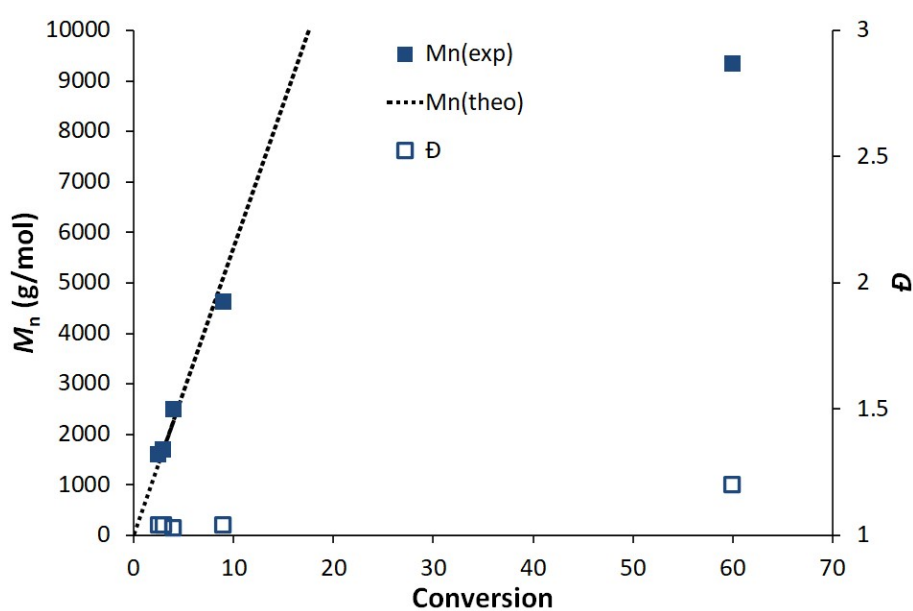

Figure S2. Dependence of the PCL molar masses ( $M_{n,\text{corr}}$ , solid symbols) and dispersity indexes ( $\bar{D}$ , empty symbols) on the CL conversion for the bulk ROP of CL at 120 °C initiated by complex **1** (initial ratio:  $[\text{CL}]/[\mathbf{1}] = 500$ ). The dotted black line represents the theoretical  $M_n$  values.

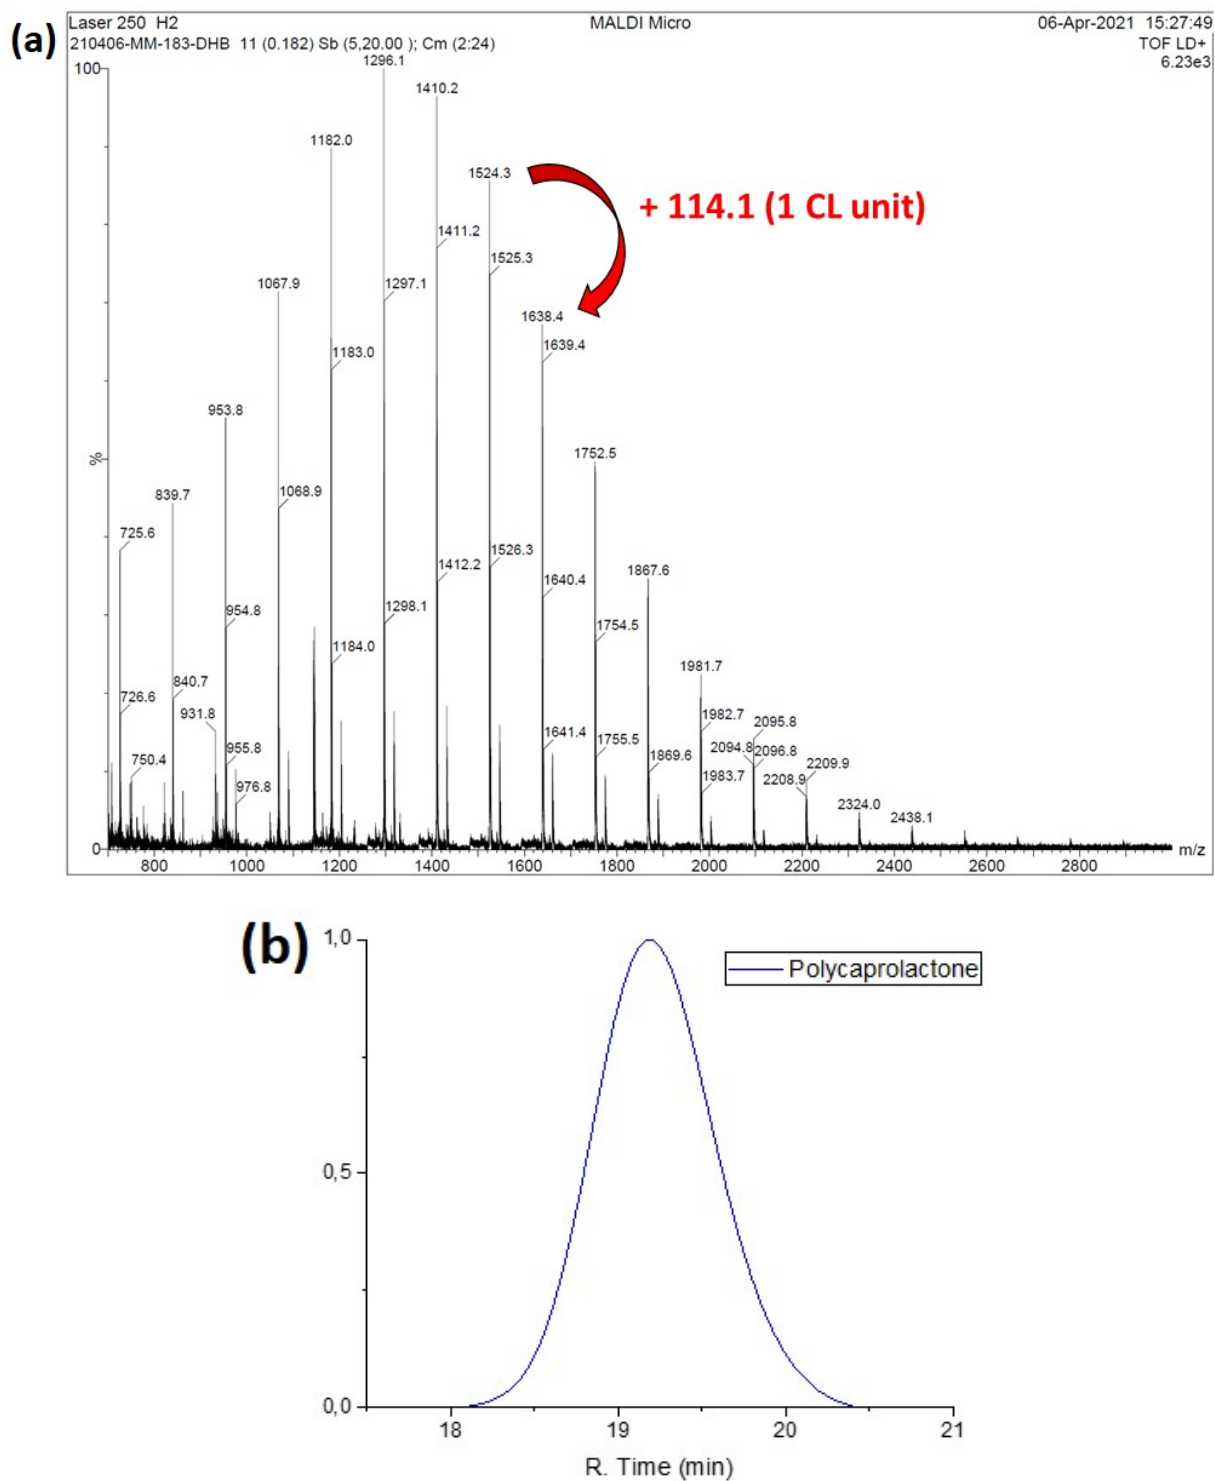

Figure S3. Analyses of the low molar-mass PCL prepared by ROP of CL mediated by **1**. Conditions: CL/**1** = 200/1, bulk, 100 °C, 70 h, 18% conversion. (a) MALDI-ToF mass spectrum (matrix: polymer/DHB/NaI 1:3:1); (b) GPC trace ( $M_{n,corr}$  = 1600 g/mol,  $\bar{D}$  = 1.07).

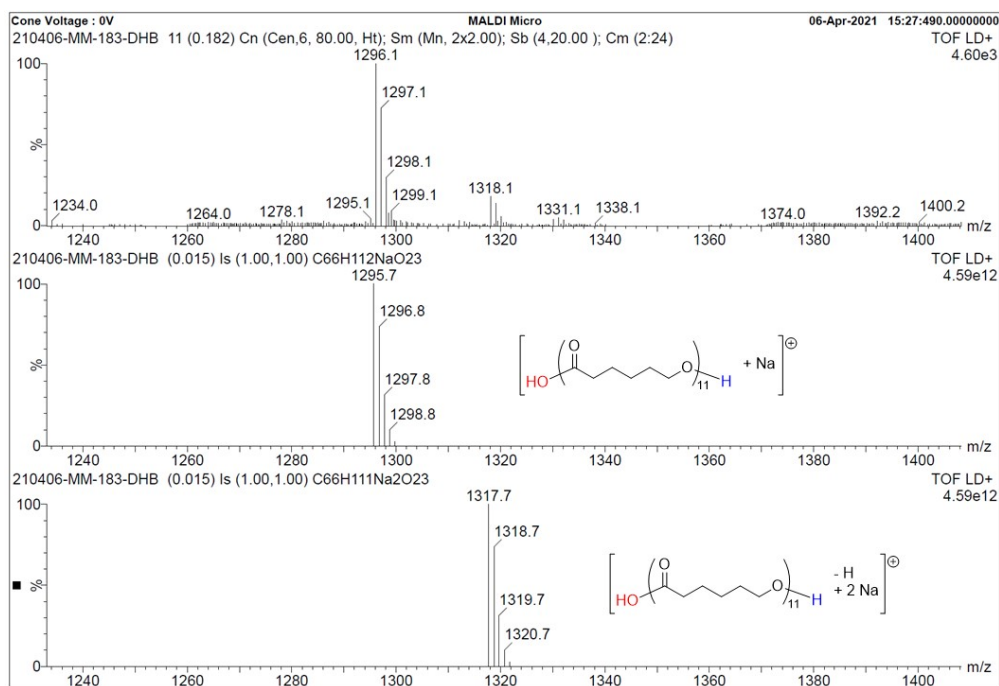

Figure S4. Expanded region of the MALDI-ToF spectrum in Figure S3 highlighting the isotopic envelopes with main peaks at 1296.1 and 1317.7 a.u. (top) and simulated isotopic distributions for two proposed formulas for 11 CL units (middle and bottom).

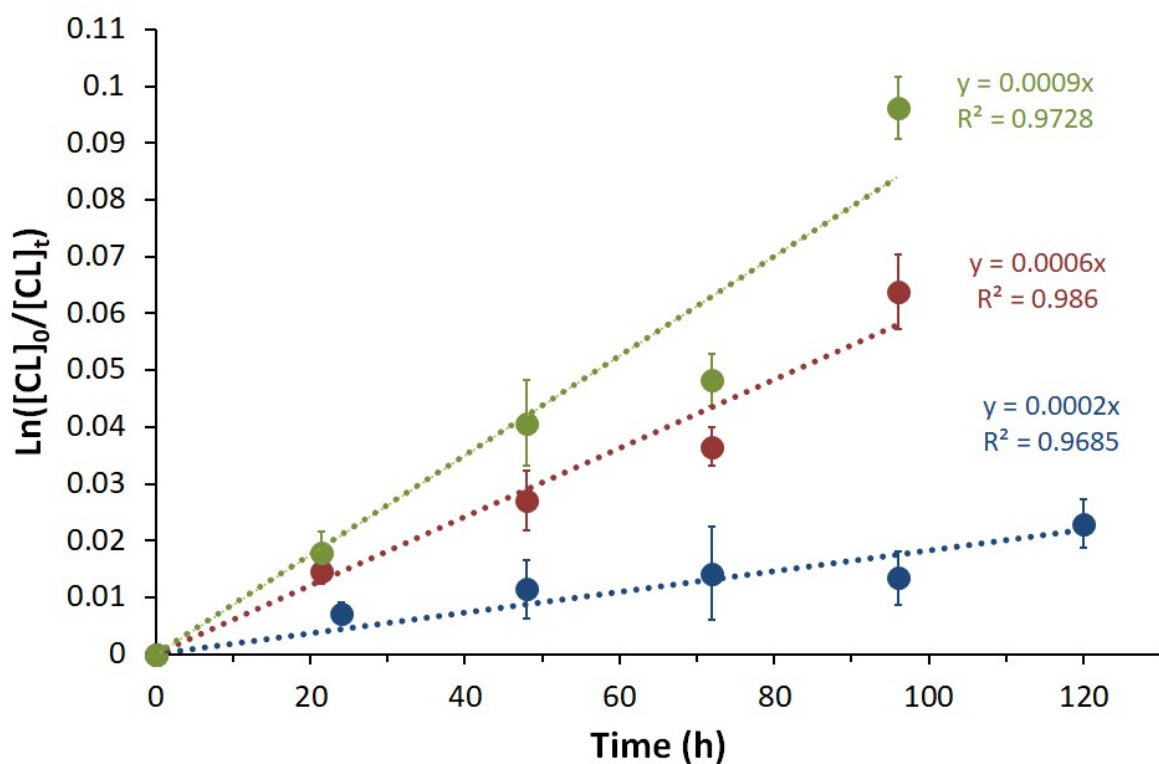

Figure S5. Pseudo-first-order kinetic data for the bulk ROP of CL at 120 °C initiated by complex 1 in the absence or presence of MeOH (initial ratio [CL]/[1]/[MeOH] = 500:1:0 (blue), 2 (red), 5 (green)). Each data point represents the average of three independent experiments and error bars correspond to the standard deviation. The linear fits are shown as visual guides.

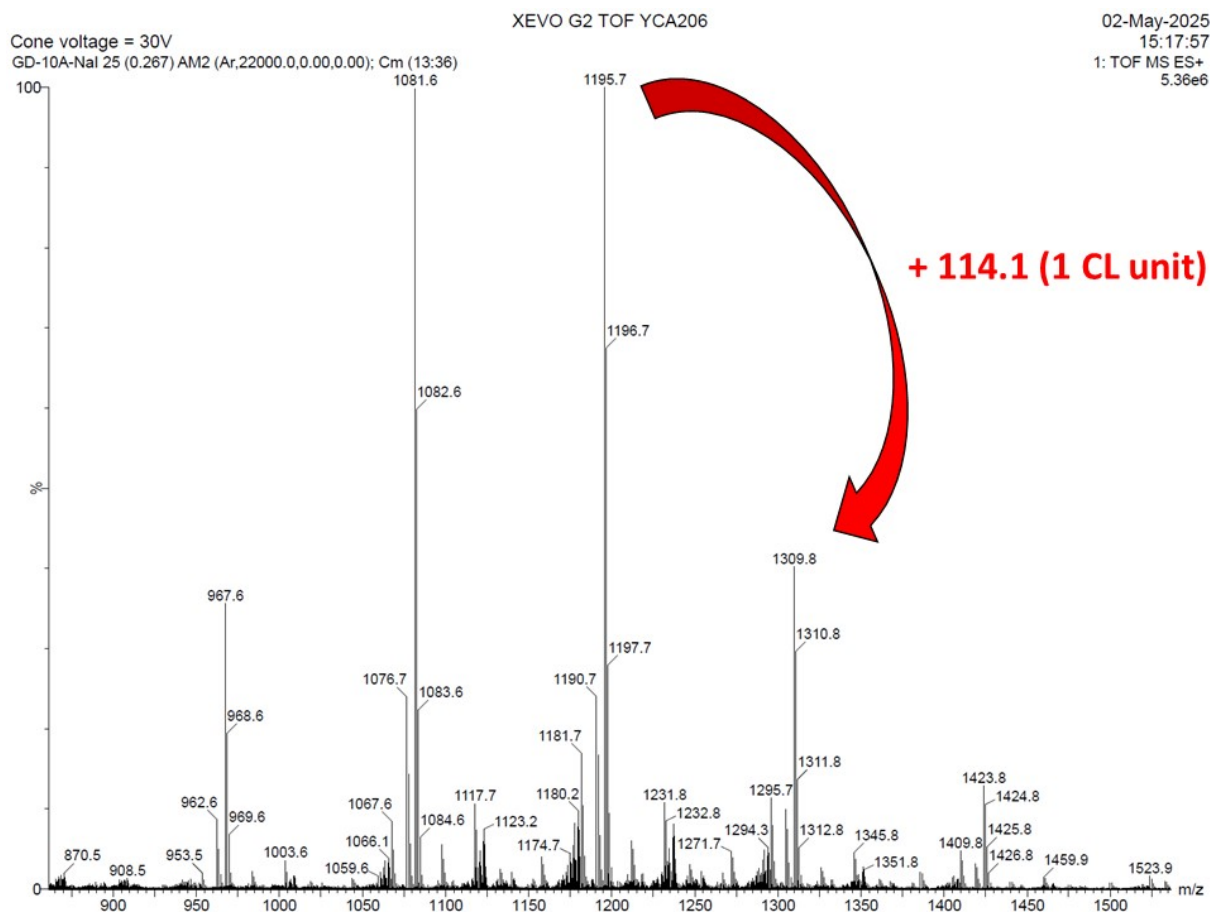

Figure S6. ESI-MS spectrum (with addition of NaI) of the low molar-mass PCL prepared by immortal ROP of CL mediated by **1**. Conditions: CL/**1**/MeOH = 500/1/2, bulk, 120 °C, 21.5 h, 6% conversion,  $M_{n,corr}$  = 1700 g/mol,  $D$  = 1.02 (Table S1, Entry 6).



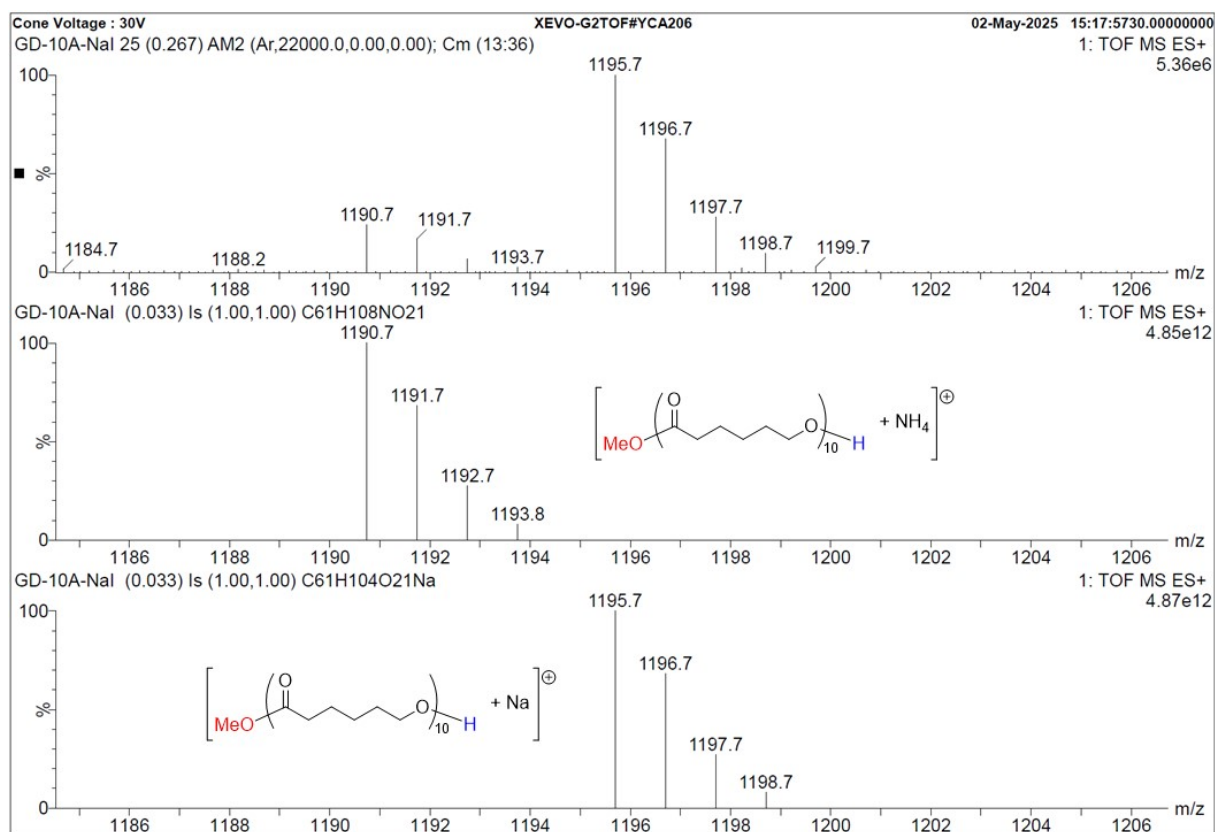

Figure S7. Expanded region of the ESI-MS spectrum in Figure S5 highlighting the isotopic envelopes with peaks at 1190.7 and 1195.7 a.u. (top) and simulated isotopic distributions for two proposed formulas for 10 CL units (middle and bottom).

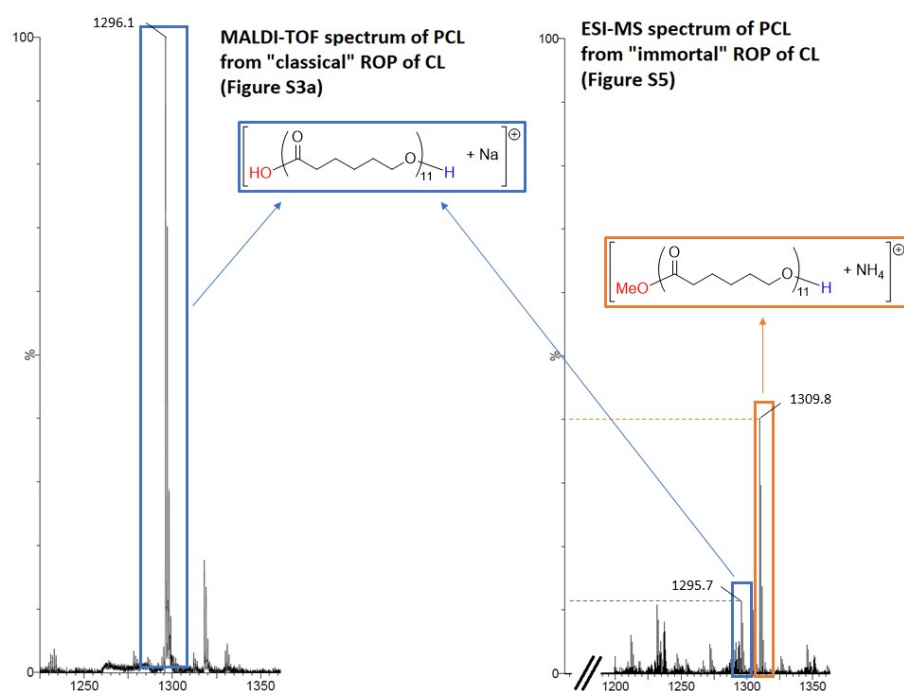

Figure S8. Expanded regions of the MALDI-ToF spectra in Figure S3a and ESI-MS spectrum in Figure S5 highlighting the presence of the isotopic envelope corresponding to PCL initiated by the OAc group (blue boxes) in both spectra.

Table S2. Results of the bulk ROP of *L*-lactide (LLA) at 120 °C initiated by complex **1**.

| Entry | [LLA] <sub>0</sub> /[ <b>1</b> ] | [BnOH]/[ <b>1</b> ] | Time<br>(h) | Conv. <sup>a</sup><br>(%) | <i>M</i> <sub>n,theo</sub> <sup>b</sup><br>(g/mol) | <i>M</i> <sub>n,corr</sub> <sup>c</sup><br>(g/mol) | <i>Đ</i> <sup>d</sup> |
|-------|----------------------------------|---------------------|-------------|---------------------------|----------------------------------------------------|----------------------------------------------------|-----------------------|
| 1     | 500                              | 0                   | 9           | 3                         | 2200                                               | 700                                                | 1.03                  |
| 2     | 500                              | 0                   | 24          | 6                         | 4300                                               | 1900                                               | 1.34                  |
| 3     | 500                              | 0                   | 35          | 11                        | 7900                                               | 7600                                               | 1.13                  |
| 4     | 500                              | 0                   | 48          | 16                        | 11500                                              | 10800                                              | 1.34                  |
| 5     | 500                              | 0                   | 96          | 33                        | 23800                                              | 14100                                              | 1.30                  |
| 6     | 500                              | 2                   | 21.5        | 11.5                      | 2900                                               | 1700                                               | 1.20                  |
| 7     | 500                              | 2                   | 48          | 28.5                      | 7000                                               | 3800                                               | 1.33                  |
| 8     | 500                              | 2                   | 72          | 36                        | 8800                                               | 4800                                               | 1.31                  |
| 9     | 500                              | 2                   | 96          | 45                        | 10900                                              | 5700                                               | 1.36                  |
| 10    | 500                              | 5                   | 21.5        | 23                        | 2900                                               | 2000                                               | 1.25                  |
| 11    | 500                              | 5                   | 46          | 36                        | 4400                                               | 5300                                               | 1.19                  |
| 12    | 500                              | 5                   | 72          | 45                        | 5500                                               | 6200                                               | 1.29                  |

<sup>a</sup> Determined by gravimetry and/or from <sup>1</sup>H NMR analysis. <sup>b</sup> Calculated according to  $M_{n,theo} = ([LLA]_0/[1]) \times (1/([1]+[MeOH])) \times M_{LLA} \times \text{conversion}$ , where [init] = 1, 3 or 6 for [BnOH]/[**1**] = 0, 2, 5, respectively, and  $M_{LLA} = 144.13$  g/mol. The molecular weights of both the α- (initiating group(s)) and ω-chain (H) end were not taking into account due to their negligible masses. <sup>c</sup> Determined by GPC using polystyrene standards and applying the correction factor of 0.58. <sup>d</sup> Determined by GPC.

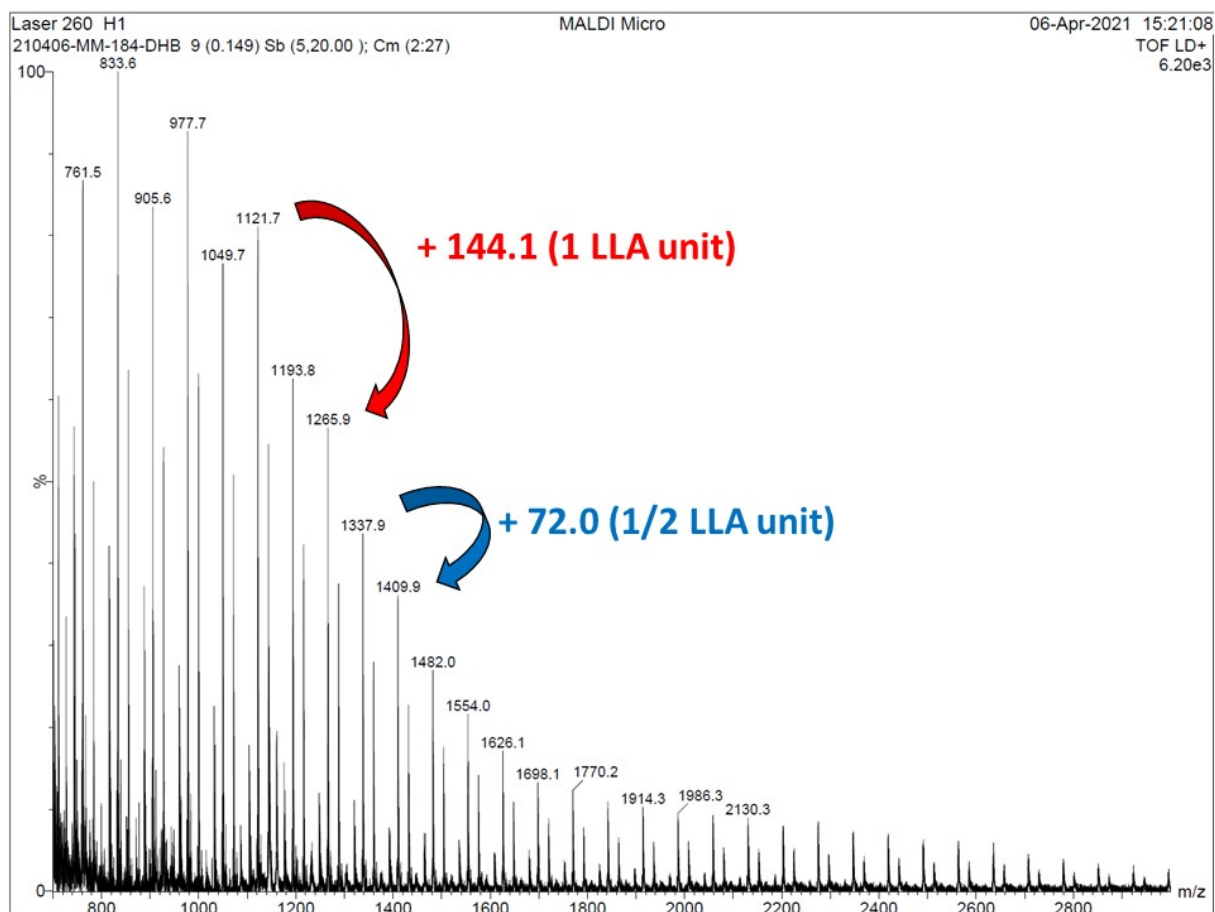

Figure S9. MALDI-ToF mass spectrum (matrix: polymer/DHB/NaI 1:3:1) of the low molar-mass PLLA prepared by ROP of LLA mediated by **1**. Conditions: LLA/**1** = 500/1, bulk, 120 °C, 24 h, 6% conversion,  $M_{n,corr}$  = 1900 g/mol,  $\bar{D}$  = 1.14 (Table S2 – Entry 2).

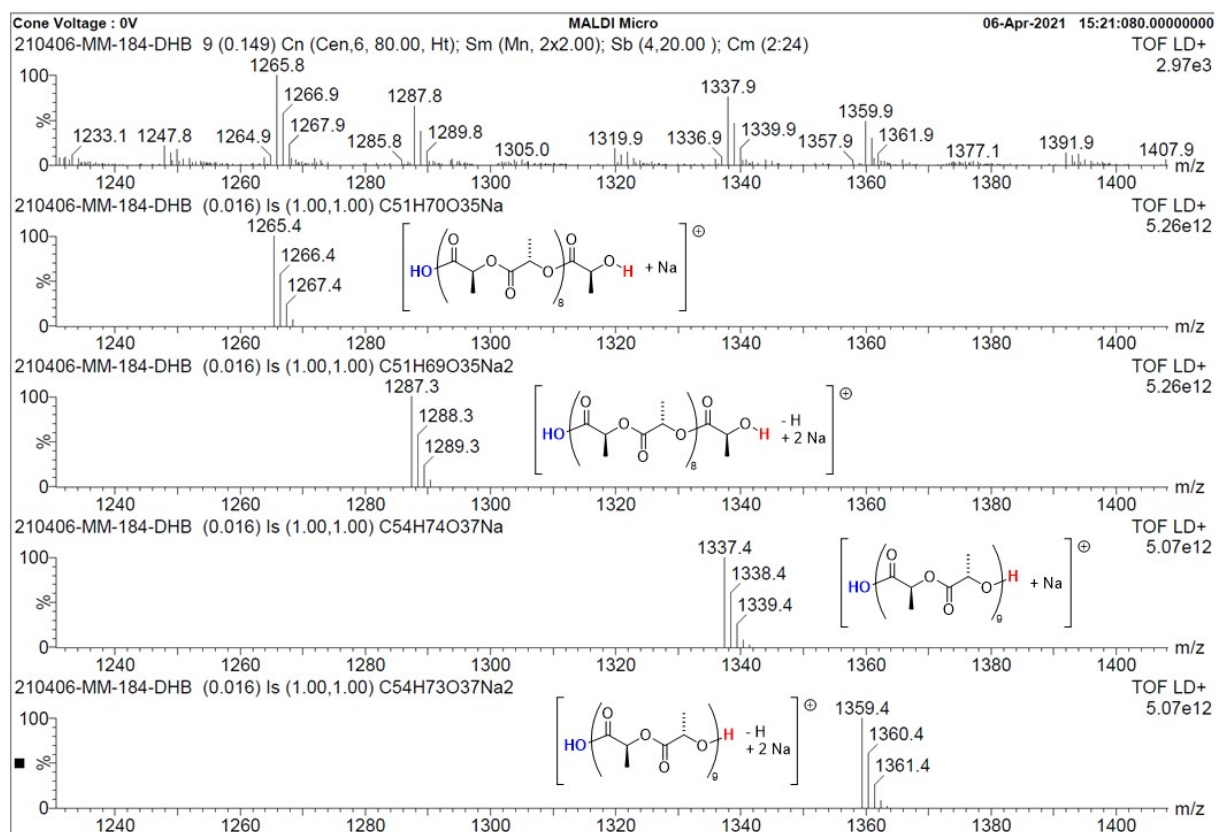

Figure S10. Expanded region of the ESI-MS spectrum in Figure S7 highlighting different isotopic envelopes in the region 1265.8-1359.4 a.u. (1<sup>st</sup> line) and simulated isotopic distributions for four proposed formulas for 8 LLA units (2<sup>nd</sup> and 3<sup>rd</sup> lines) and 9 LLA units (4<sup>th</sup> and 5<sup>th</sup> lines).

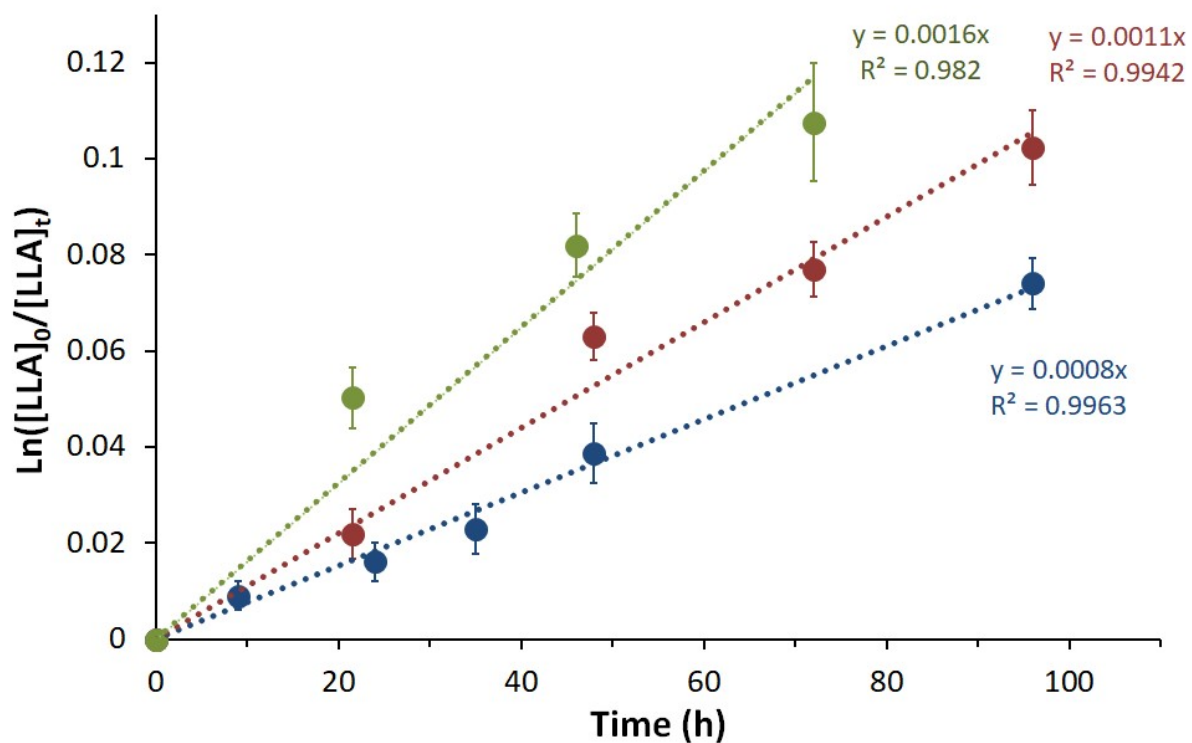

Figure S11. Pseudo-first-order kinetic data for the bulk ROP of LLA at 120 °C initiated by complex **1** in the absence or presence of MeOH (initial ratio [LLA]/[**1**]/[MeOH] = 500:1:0 (blue), 2 (red), 5 (green)). Each data point represents the average of three independent experiments and error bars correspond to the standard deviation. The linear fits are shown as visual guides.

Data file: D:\240725\CFL-2025-07-03-B.txt  
Processing mass range 999.0 to 7501.0  
Peak width TOF, 0.100 Da at 2652.000 m/z  
Peak detected, area intensity  
Baseline subtraction width 500.0 Da

CFL-2025-07-03-B.txt RT: 0.00 Spectrum: 1 691886 Points

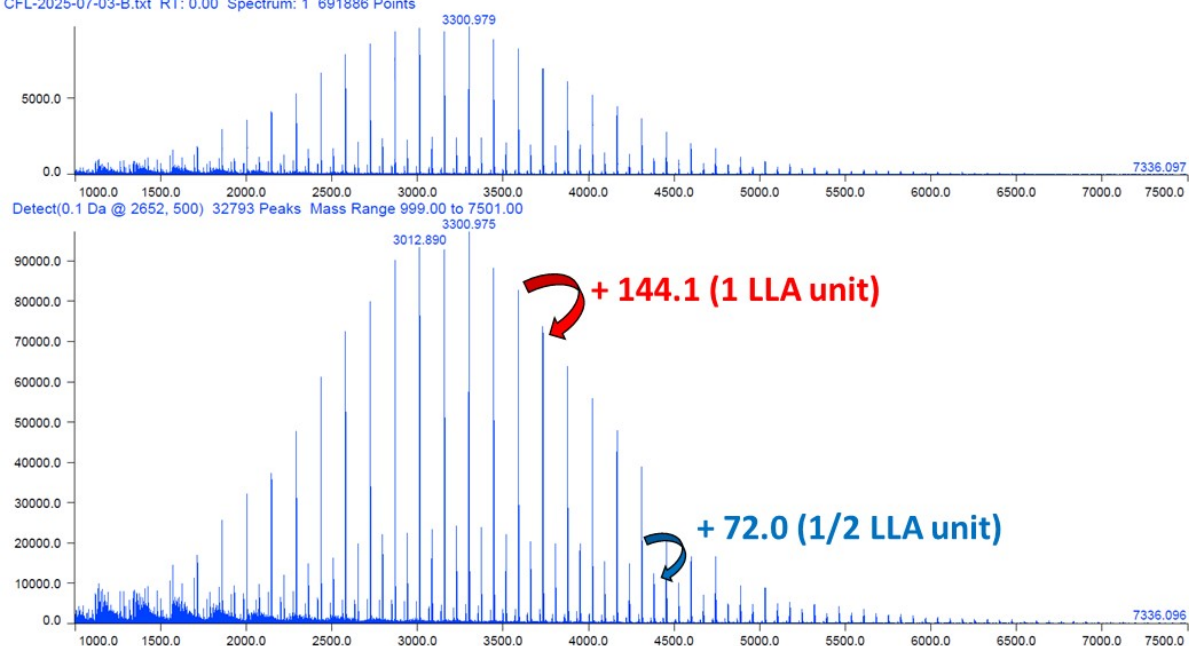

Figure S12. MALDI-ToF mass spectrum (matrix: polymer/DHB/NaI 1:3:1) of the low molar-mass PLLA prepared by immortal ROP of LLA mediated by **1**. Conditions: LLA/**1** = 500/5, bulk, 120 °C, 24 h, 29% conversion,  $M_{n,corr}$  = 3300 g/mol,  $\bar{D}$  = 1.16.

Data file: D:\240725\CFL-2025-07-03-B.txt  
Monoisotopic mass mode  
Match tolerance TOF mode +/- 0.050 Da at 2652.0 m/z

### Homopolymer Results Summary

| Series        | Label    | Mv       | Ms       | PD    | DPn    | DPw    | DPz    | Percent Series | Percent Spectrum |
|---------------|----------|----------|----------|-------|--------|--------|--------|----------------|------------------|
| Total/Average | 3302.221 | 3561.809 | 3812.322 | 1.080 | 44.350 | 47.955 | 51.433 | 100.00         | 49.32            |
| S1            | 3376.866 | 3613.847 | 3844.120 | 1.070 | 45.375 | 48.577 | 51.475 | 88.50          | 43.85            |
| S2            | 2710.950 | 3145.058 | 3557.660 | 1.260 | 36.141 | 42.168 | 47.897 | 11.10          | 5.47             |

  

| Series        | Label     | Alpha  | Omega     |
|---------------|-----------|--------|-----------|
| Series        | End Group | Repeat | End Group |
| Total/Average | C7H70     | C3H402 | H         |
| S1            | C7H70     | C3H402 | H         |
| S2            | C7H70     | C3H402 | H         |

  

| Series        | Label | Charge State | Adduct | Adduct Charge | Loss | Series Formula                |
|---------------|-------|--------------|--------|---------------|------|-------------------------------|
| Total/Average | 1     | Na           | 1      |               |      |                               |
| S1            | 1     | Na           | 1      |               |      | C7H70 [C3H402] n H + Na       |
| S2            | 1     | Na           | 1      | H2O           |      | C7H70 [C3H402] n H + Na - H2O |

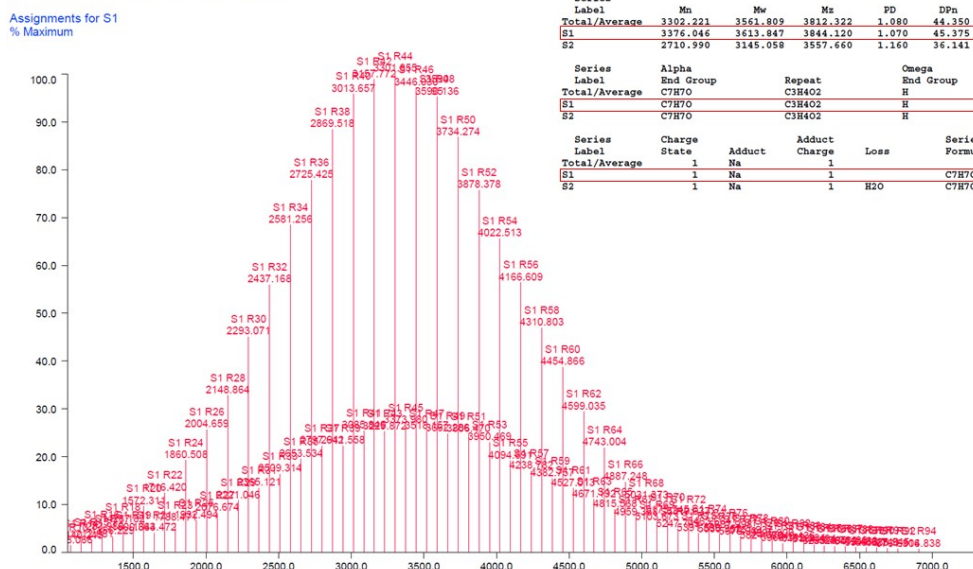

Figure S13a. Most abundant homopolymer identified using the Polymerix software, from the MALDI-ToF mass spectrum in Figure S9.

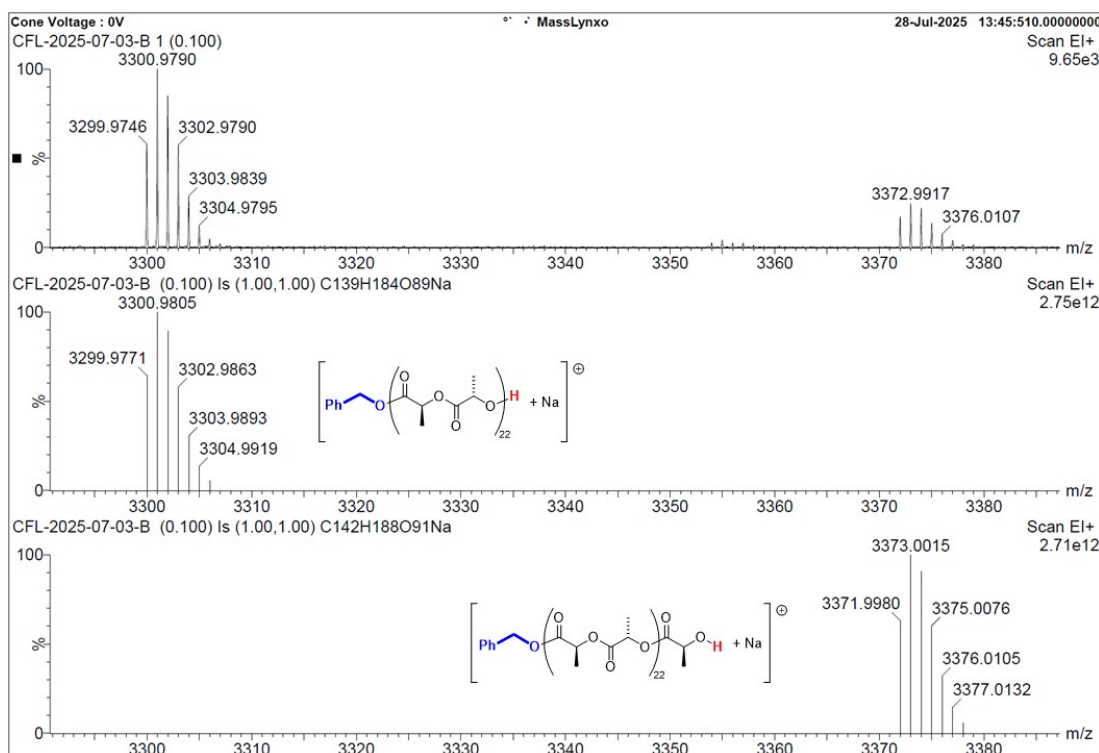

Figure S13b. Expanded region of the MALDI-ToF spectrum in Figure S9 highlighting the isotopic envelopes with main peaks at 3300.9 and 3372.9 a.u. (top) and simulated isotopic distributions for two proposed formulas for 22 LLA units (middle and bottom).



Assignments for S2  
% Maximum

### Homopolymer Results Summary

| Series        |           |          |          |       |           |                        |        | Percent | Percent  |
|---------------|-----------|----------|----------|-------|-----------|------------------------|--------|---------|----------|
| Label         | Mn        | Mw       | Mz       | PD    | DPn       | DPw                    | DPz    | Series  | Spectrum |
| Total/Average | 3302.221  | 3561.809 | 3912.322 | 1.080 | 44.350    | 47.955                 | 51.433 | 100.00  | 49.32    |
| S1            | 3374.65   | 3613.847 | 3844.120 | 1.075 | 45.575    | 48.577                 | 51.875 | 88.90   | 43.85    |
| S2            | 2710.990  | 3145.058 | 3557.660 | 1.160 | 36.141    | 42.168                 | 47.897 | 11.10   | 5.47     |
| Series        | Alpha     |          |          | Omega |           |                        |        |         |          |
| Label         | Rnd Group | Repeat   |          |       | Rnd Group |                        |        |         |          |
| Total/Average | C7H7O     | C3H4O2   |          |       | H         |                        |        |         |          |
| S1            | C7H7O     | C3H4O2   |          |       | H         |                        |        |         |          |
| S2            | C7H7O     | C3H4O2   |          |       | H         |                        |        |         |          |
| Series        | Charge    | Adduct   |          |       | Series    | Formula                |        |         |          |
| Label         | State     | Adduct   | Charge   | Loss  |           |                        |        |         |          |
| Total/Average | 1         | Na       | 1        |       | C7H7O     | [C3H4O2]n H + Na       |        |         |          |
| S1            | 1         | Na       | 1        |       | C7H7O     | [C3H4O2]n H + Na       |        |         |          |
| S2            | 1         | Na       | 2        | H2O   | C7H7O     | [C3H4O2]n H + Na - H2O |        |         |          |

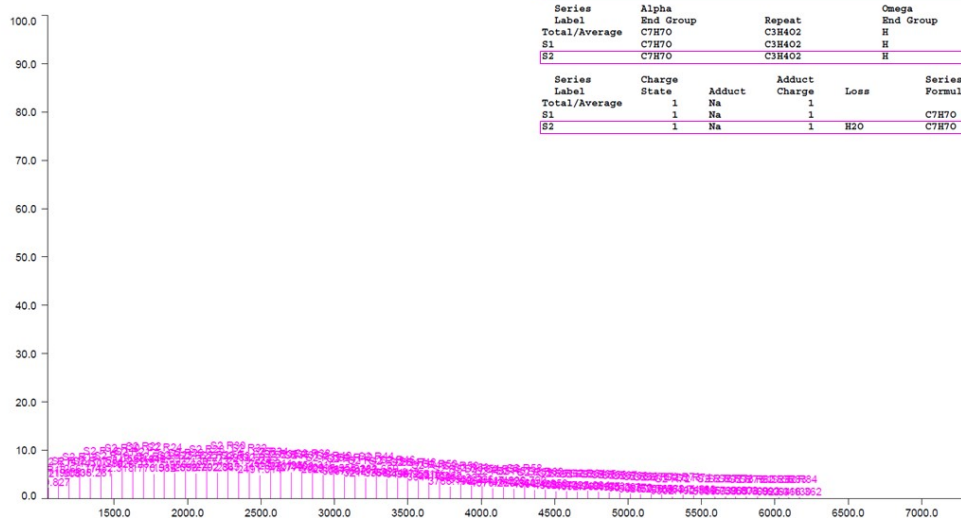

Figure S14a. Lowest abundant homopolymer identified using the Polymerix software, from the MALDI-ToF mass spectrum in Figure S9.

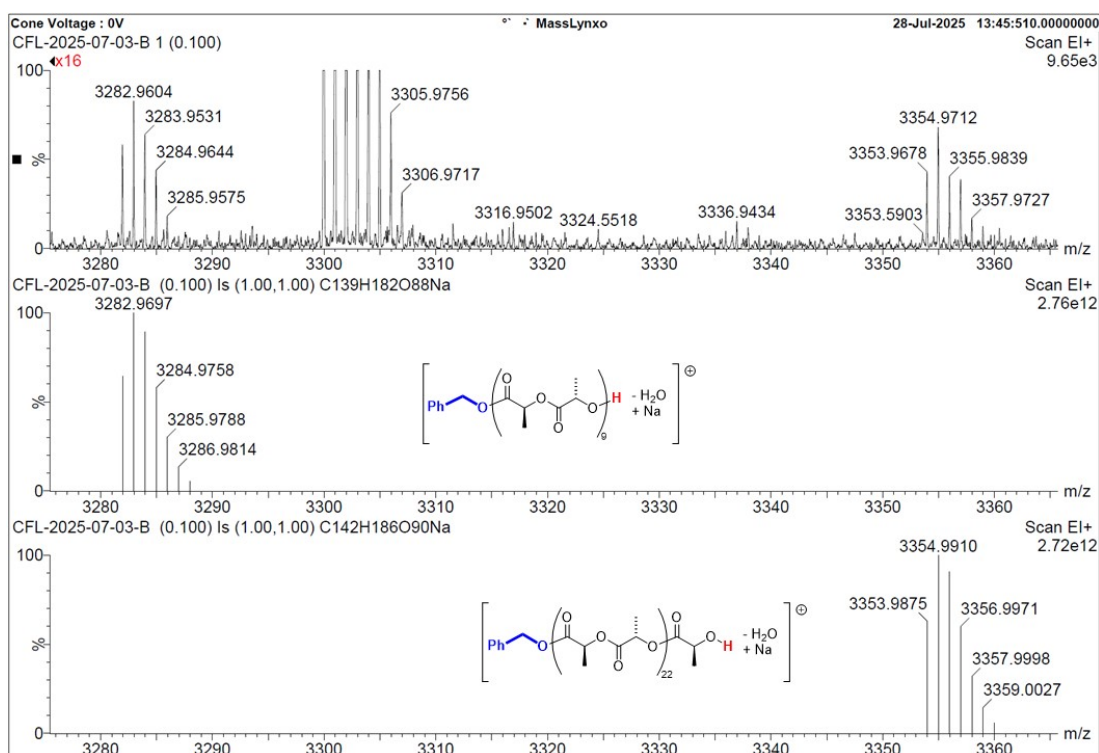

Figure S14b. Expanded region of the MALDI-ToF spectrum in Figure S9 (zoom x16) highlighting the isotopic envelopes with main peaks at 3282.9 and 3354.9 a.u. (top) and simulated isotopic distributions for two proposed formulas for 22 LLA units (middle and bottom).

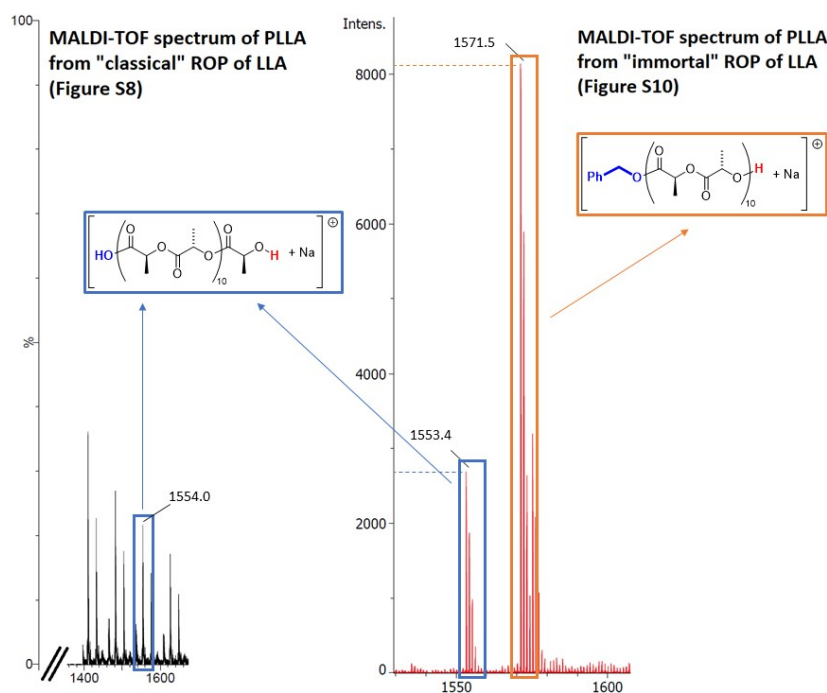

Figure S15. Expanded regions of the MALDI-ToF spectra in Figure S8 and Figure S10 highlighting the presence of the isotopic envelope corresponding to PLLA initiated by the OAc group (blue boxes) in both spectra.

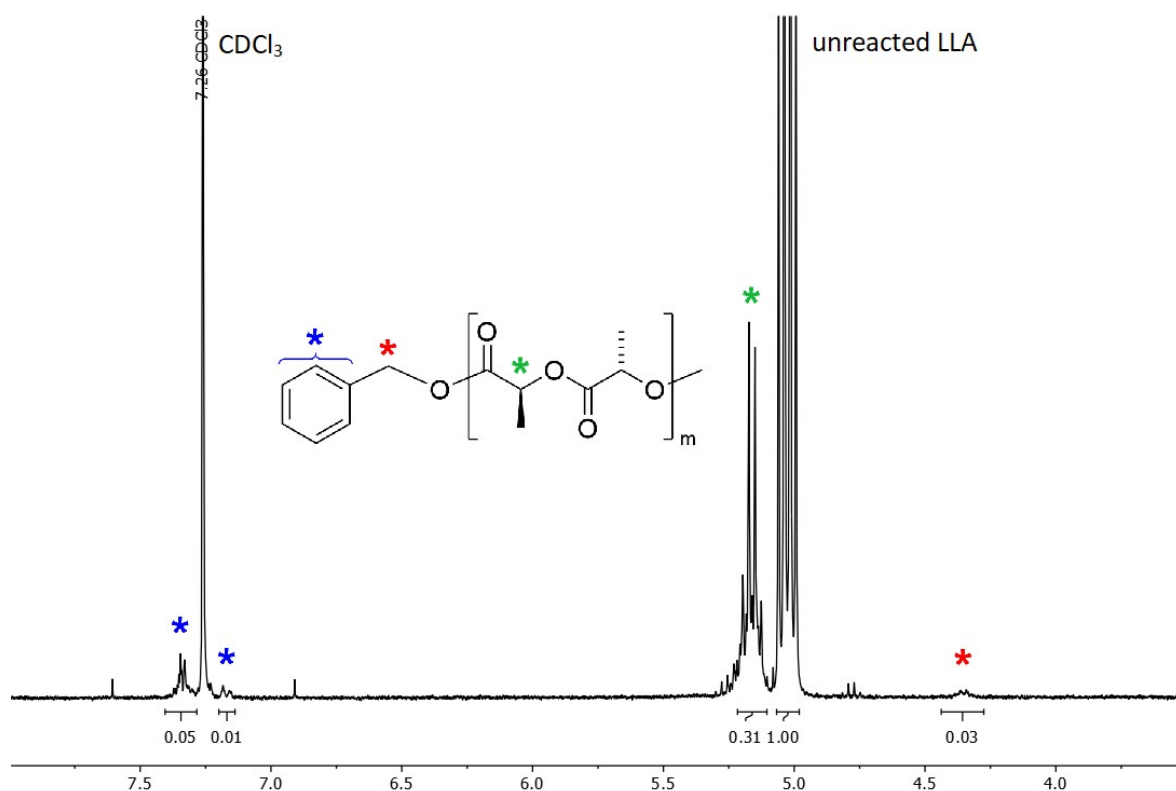

Figure S16. <sup>1</sup>H NMR spectrum (expansion of the 3.5-8 ppm region, CDCl<sub>3</sub>) of the PLLA prepared by immortal ROP of LLA mediated by **1**, showing the signals of the terminal PLLA-OCH<sub>2</sub>Ph group. Conditions: LLA/**1**/BnOH = 500/1/5, bulk, 120 °C, 21.5 h, 23% conversion, *M*<sub>n,corr</sub> = 1700 g/mol, *D* = 1.02 (Table S1- Entry 10).

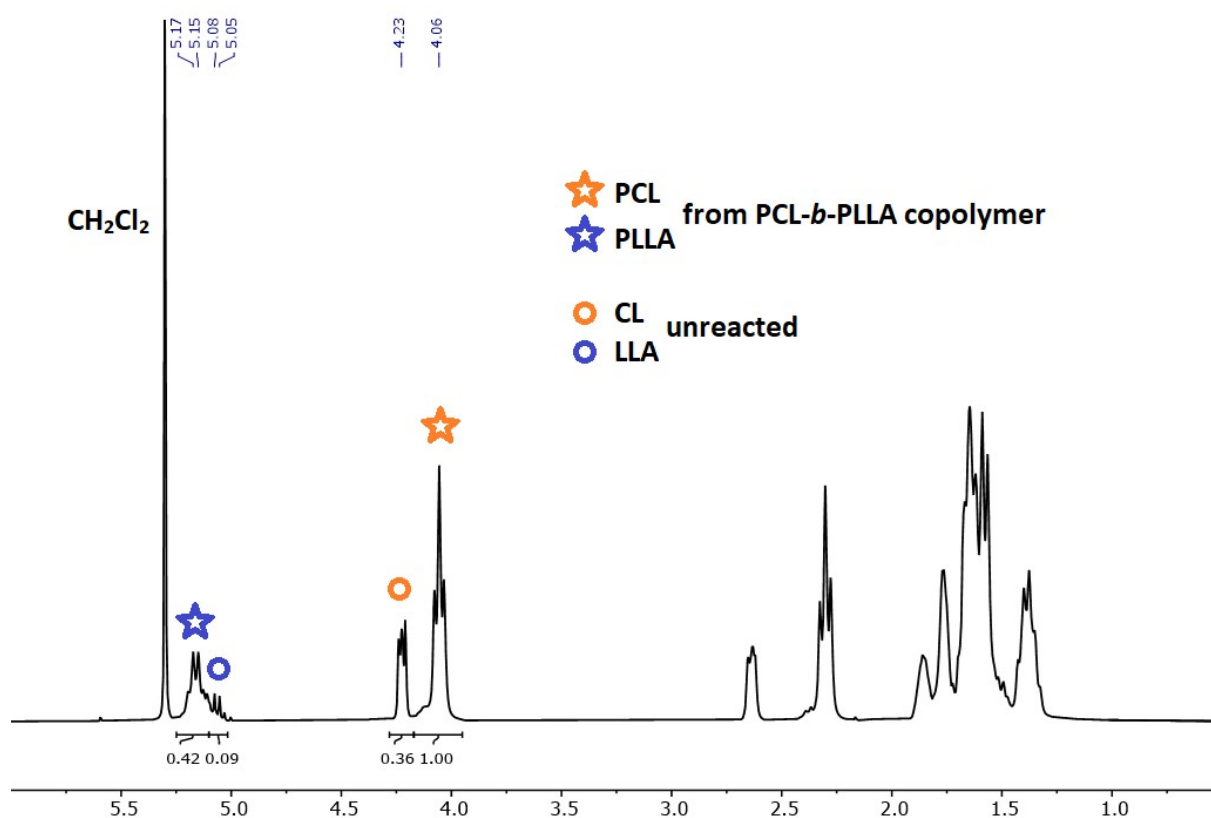

Figure S17. <sup>1</sup>H NMR spectrum (expansion of the 0.5-6 ppm region, CDCl<sub>3</sub>) of the reaction medium (diluted in CH<sub>2</sub>Cl<sub>2</sub>) of the sequential bulk copolymerization of CL and LLA catalysed by complex **1** under immortal conditions. Conditions: Co/CL/LLA/BnOH = 1/500/500/10, bulk, 120 °C, 108 + 48 h, 73% and 82% conversion of CL and LLA, respectively.

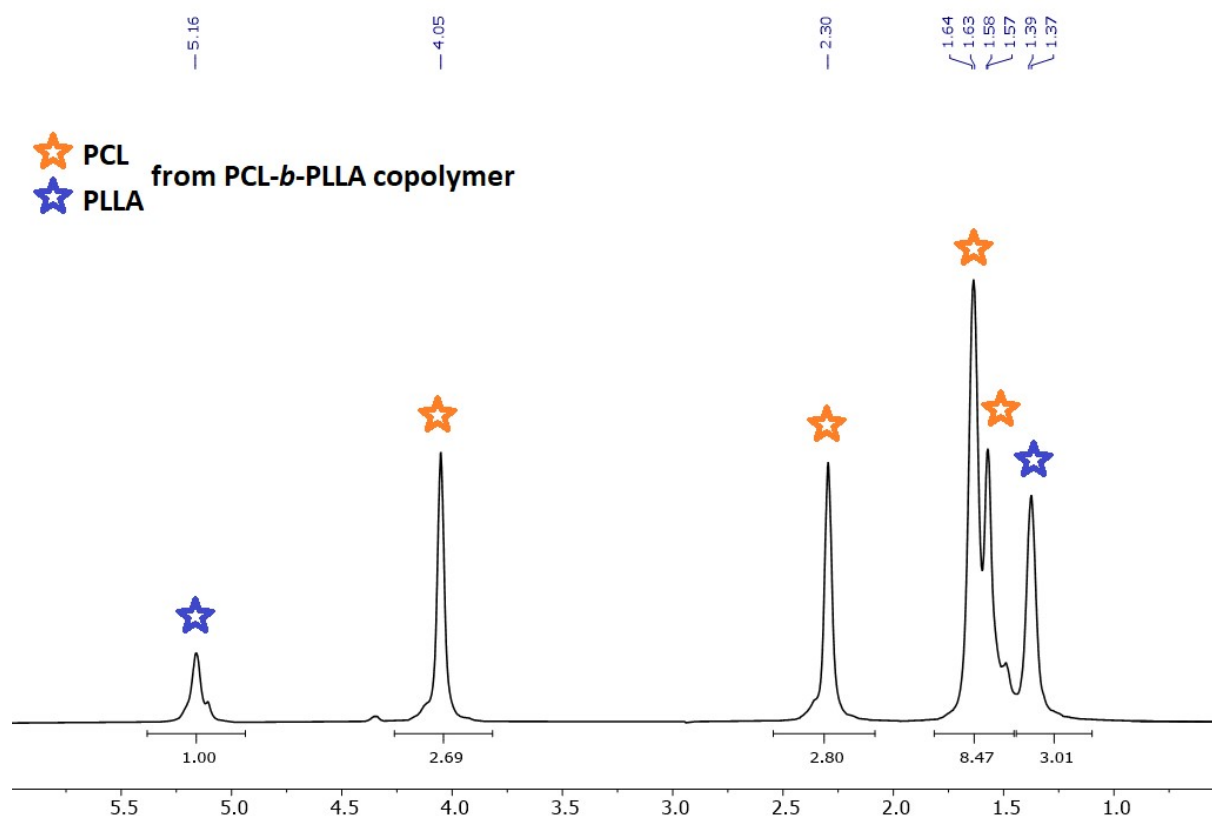

Figure S18.  $^1\text{H}$  NMR spectrum (expansion of the 0.5–6 ppm region,  $\text{CDCl}_3$ ) of the isolated PCL-*b*-PLLA block copolymer synthesized by sequential bulk copolymerization of CL and LLA catalysed by complex **1** under immortal conditions. Conditions: Co/CL/LLA/BnOH = 1/500/500/10, bulk, 120 °C, 108 + 48 h, 73% and 82% conversion of CL and LLA, respectively.
